# Supplementary material for: Whole-Genome Sequencing Enables Molecular Characterization of Non-Clonal Group 258 High-Risk Clones (ST13, ST17, ST147 and ST307) among Carbapenem-Resistant Klebsiella pneumoniae from a Tertiary University Hospital Centre in Portugal
Source: MDPI journal article supplement (doi:10.3390/microorganisms10020416), 2022-02-11
Supplement: s1 [file s1]

**Whole-Genome Sequencing Enables Molecular Characterization of Non-Clonal Group 258 High-Risk Clones (ST13, ST17, ST147 and ST307) Among Carbapenem-Resistant *Klebsiella pneumoniae* From a Tertiary University Hospital Centre in Portugal**

Mendes, G.; Ramalho, J.F.; Bruschy-Fonseca, A.; Lito, L.; Duarte, A.; Melo-Cristino, J.; Caneiras, C.

**Table S1.** Information about the assembly of the 68 carbapenem-resistant *K. pneumoniae* sequenced by WGS and *de novo* assembled genomes.

| Identification (ID) FMUL | Number of Contigs | Total contig length | Largest contig | N50    | Average coverage |
|--------------------------|-------------------|---------------------|----------------|--------|------------------|
| 5                        | 125               | 5611042             | 554205         | 298305 | 256.61           |
| 17                       | 113               | 5719986             | 584048         | 199665 | 187.49           |
| 20                       | 76                | 5706460             | 915546         | 286255 | 136.86           |
| 22                       | 42                | 5491341             | 740786         | 405384 | 225.80           |
| 24                       | 104               | 5450169             | 487855         | 214006 | 216.60           |
| 26                       | 77                | 5705687             | 915545         | 286255 | 197.25           |
| 27                       | 103               | 5637389             | 658766         | 263369 | 191.93           |
| 43                       | 100               | 5 604 241           | 610066         | 195765 | 192.23           |
| 45                       | 107               | 5617887             | 552923         | 194248 | 192.09           |
| 48                       | 90                | 5545841             | 793180         | 359130 | 201.36           |
| 60                       | 109               | 5615414             | 1037085        | 259885 | 256.61           |
| 71                       | 95                | 5512395             | 792761         | 268298 | 226.19           |
| 81                       | 96                | 5536904             | 863147         | 178236 | 226.03           |
| 92                       | 46                | 5489913             | 923505         | 405414 | 243.02           |
| 99                       | 49                | 5489507             | 924021         | 348058 | 207.11           |
| 101                      | 102               | 5 580 661           | 858711         | 307551 | 221.03           |
| 102                      | 82                | 5 551 519           | 604608         | 214444 | 212.58           |
| 116                      | 78                | 5684618             | 708530         | 243585 | 219.15           |
| 122                      | 46                | 5489302             | 923934         | 363628 | 213.91           |
| 127                      | 87                | 5580241             | 978953         | 376198 | 227.76           |
| 132                      | 81                | 5 539 418           | 1028473        | 294442 | 306.07           |
| 181                      | 108               | 5 719 355           | 692567         | 309497 | 317.55           |
| 184                      | 98                | 5 758 538           | 705745         | 216165 | 280.11           |
| 224                      | 98                | 5724103             | 433151         | 260519 | 227.87           |
| 233                      | 79                | 5 695 553           | 530336         | 226198 | 276.76           |
| 245                      | 233               | 5 839 418           | 685269         | 198011 | 280.73           |
| 247                      | 77                | 5696342             | 529808         | 226209 | 114.96           |
| 248                      | 177               | 9 913 695           | 730956         | 225816 | 176.11           |
| 257                      | 78                | 5518529             | 727932         | 338209 | 541.27           |
| 274                      | 73                | 5 695 004           | 530340         | 230677 | 372.12           |
| 296                      | 83                | 5 691 504           | 779964         | 207802 | 335.35           |
| 345                      | 51                | 5 443 567           | 681408         | 293448 | 339.12           |
| 363                      | 63                | 5 452 377           | 385894         | 247705 | 215.44           |

| Identification<br>(ID) FMUL | Number of Contigs | Total contig length | Largest contig | N50    | Average coverage |
|-----------------------------|-------------------|---------------------|----------------|--------|------------------|
| 443                         | 92                | 5542756             | 718515         | 188012 | 248.67           |
| 447                         | 73                | 5 506 662           | 951136         | 292368 | 299.04           |
| 449                         | 111               | 5 853 655           | 636239         | 253169 | 337.40           |
| 451                         | 100               | 5 621 958           | 792956         | 194250 | 357.03           |
| 460                         | 113               | 5819352             | 656250         | 253401 | 278.37           |
| 462                         | 109               | 5656818             | 792478         | 263369 | 197.63           |
| 463                         | 104               | 5627251             | 793391         | 359320 | 227.14           |
| 465                         | 104               | 5624043             | 792801         | 184560 | 202.03           |
| 467                         | 128               | 5689145             | 500882         | 219420 | 243.83           |
| 470                         | 107               | 5611340             | 750180         | 270645 | 306.01           |
| 471                         | 74                | 5484948             | 727516         | 240748 | 293.41           |
| 473                         | 116               | 5672086             | 493556         | 268795 | 359.93           |
| 476                         | 91                | 5 555 088           | 610160         | 268289 | 279.68           |
| 498                         | 117               | 5 828 917           | 630406         | 253191 | 279.68           |
| 499                         | 75                | 5 689 862           | 576250         | 229813 | 385.79           |
| 500                         | 75                | 5 694 730           | 530271         | 221521 | 309.13           |
| 501                         | 74                | 5 629 248           | 658574         | 247536 | 330.53           |
| 502                         | 87                | 5691206             | 708559         | 181455 | 252.18           |
| 516                         | 98                | 5702226             | 525355         | 249559 | 325.68           |
| 517                         | 105               | 5569185             | 516793         | 169483 | 285.81           |
| 522                         | 61                | 5444295             | 741641         | 244598 | 301.51           |
| 523                         | 93                | 5703955             | 630384         | 255323 | 233.1            |
| 533                         | 61                | 5614083             | 553264         | 296524 | 220.35           |
| 535                         | 114               | 5830252             | 533496         | 295588 | 319.28           |
| 548                         | 75                | 5666757             | 576248         | 226159 | 256.02           |
| 584                         | 102               | 5547028             | 546112         | 178301 | 257.18           |
| 592                         | 89                | 5527889             | 535306         | 194812 | 266.19           |
| 595                         | 54                | 5356080             | 529913         | 268978 | 283.28           |
| 596                         | 83                | 5689842             | 610673         | 206447 | 238.86           |
| 648                         | 102               | 5 800 512           | 610489         | 315125 | 209.96           |
| 679                         | 59                | 5 503 955           | 806216         | 301075 | 186.85           |
| 680                         | 88                | 5 581 723           | 571899         | 351014 | 228.94           |
| 681                         | 104               | 5 672 768           | 550247         | 233325 | 212.63           |
| 683                         | 43                | 5 487 624           | 540594         | 329632 | 253.51           |
| 685                         | 100               | 5 674 813           | 547490         | 238159 | 244.10           |

---
